# Supplementary material for: Construction of a family of Ln3 clusters using multidentate Schiff base and β-diketonate ligands: fluorescence properties, magnetocaloric effect and slow magnetic relaxation
Source: Royal Society of Chemistry journal article supplement (doi:10.1039/d0nj01172j), 2020-01-01
Supplement: d0nj01172j1.pdf [file d0nj01172j1.pdf]

## Electronic Supplementary Information

### Construction of a family of Ln<sub>3</sub> clusters using multidentate Schiff base and β-diketonate ligands: fluorescent properties, magnetocaloric effect and slow magnetic relaxation

Wen-Min Wang,<sup>a,b\*</sup> Yu Gao,<sup>a</sup> Rong-Xin Yue,<sup>a</sup> Na Qiao,<sup>a</sup> Dan-Tong Wang,<sup>a</sup> Ying Shi,<sup>a</sup> Huan Zhang<sup>\*c</sup> and Jian-Zhong Cui<sup>\*b</sup>

**Table S1.** The important bond lengths and angles for cluster 1.

| <b>Bond lengths</b> |            |                   |            |
|---------------------|------------|-------------------|------------|
| Nd(2)-O(6)          | 2.353(5)   | Nd(3)-O(16)       | 2.276(5)   |
| Nd(2)-O(3)          | 2.353(5)   | Nd(3)-N(4)        | 2.464(7)   |
| Nd(2)-O(11)         | 2.257(5)   | Nd(3)-O(14)       | 2.261(6)   |
| Nd(2)-O(5)          | 2.285(5)   | Nd(3)-O(4)        | 2.386(6)   |
| Nd(2)-O(12)         | 2.270(5)   | Nd(1)-O(6)        | 2.304(5)   |
| Nd(2)-N(3)          | 2.491(6)   | Nd(1)-O(8)        | 2.299(5)   |
| Nd(2)-N(6)          | 2.527(7)   | Nd(1)-O(10)       | 2.260(6)   |
| Nd(2)-O(2)          | 2.288(5)   | Nd(1)-O(9)        | 2.299(5)   |
| Nd(3)-O(3)          | 2.316(5)   | Nd(1)-O(1)        | 2.408(6)   |
| Nd(3)-O(13)         | 2.322(5)   | Nd(1)-O(7)        | 2.272(6)   |
| Nd(3)-O(15)         | 2.277(6)   | Nd(1)-N(1)        | 2.477(7)   |
| Nd(3)-O(5)          | 2.330(5)   | Nd(1)-O(2)        | 2.337(5)   |
| <b>Bond angles</b>  |            |                   |            |
| O(3)-Nd(2)-O(6)     | 161.86(17) | O(16)-Nd(3)-O(4)  | 85.4(2)    |
| O(11)-Nd(2)-O(6)    | 84.09(18)  | O(14)-Nd(3)-O(3)  | 86.9(2)    |
| O(11)-Nd(2)-O(3)    | 79.89(19)  | O(14)-Nd(3)-O(13) | 72.2(2)    |
| O(11)-Nd(2)-O(5)    | 107.78(17) | O(14)-Nd(3)-O(15) | 73.5(2)    |
| O(11)-Nd(2)-O(12)   | 75.62(18)  | O(14)-Nd(3)-O(5)  | 139.60(19) |
| O(11)-Nd(2)-O(2)    | 152.73(19) | O(14)-Nd(3)-O(16) | 143.8(2)   |
| O(5)-Nd(2)-O(6)     | 125.43(18) | O(14)-Nd(3)-O(4)  | 76.6(2)    |
| O(5)-Nd(2)-O(3)     | 68.33(17)  | O(6)-Nd(1)-O(1)   | 162.7(2)   |
| O(5)-Nd(2)-O(2)     | 87.51(18)  | O(6)-Nd(1)-O(2)   | 68.69(18)  |

<sup>a</sup> Department of Chemistry, Taiyuan Normal University, Jinzhong 030619, China

<sup>b</sup> Department of Chemistry, Tianjin University, Tianjin 300072, China

<sup>c</sup> School of Science, Tianjin University of Science & Technology, Tianjin 300457, China

\*Corresponding Authors E-mail : [cuijianzhong@tju.edu.cn](mailto:cuijianzhong@tju.edu.cn), [zhanghuan50423@163.com](mailto:zhanghuan50423@163.com),

[wangwenmin0506@126.com](mailto:wangwenmin0506@126.com)

|                   |            |                  |            |
|-------------------|------------|------------------|------------|
| O(12)-Nd(2)-O(6)  | 81.06(19)  | O(8)-Nd(1)-O(6)  | 87.27(19)  |
| O(12)-Nd(2)-O(3)  | 86.73(19)  | O(8)-Nd(1)-O(9)  | 143.1(2)   |
| O(12)-Nd(2)-O(5)  | 153.27(19) | O(8)-Nd(1)-O(1)  | 96.5(2)    |
| O(12)-Nd(2)-O(2)  | 100.99(19) | O(8)-Nd(1)-O(2)  | 73.47(19)  |
| O(2)-Nd(2)-O(6)   | 68.70(18)  | O(10)-Nd(1)-O(6) | 83.9(2)    |
| O(2)-Nd(2)-O(3)   | 127.27(18) | O(10)-Nd(1)-O(8) | 143.9(2)   |
| O(3)-Nd(3)-O(13)  | 86.48(19)  | O(10)-Nd(1)-O(9) | 72.8(2)    |
| O(3)-Nd(3)-O(5)   | 68.21(18)  | O(10)-Nd(1)-O(1) | 83.2(2)    |
| O(3)-Nd(3)-O(4)   | 161.8(2)   | O(10)-Nd(1)-O(7) | 72.5(2)    |
| O(13)-Nd(3)-O(5)  | 74.90(19)  | O(10)-Nd(1)-O(2) | 133.54(19) |
| O(13)-Nd(3)-O(4)  | 95.6(2)    | O(9)-Nd(1)-O(6)  | 104.57(19) |
| O(15)-Nd(3)-O(3)  | 87.9(2)    | O(9)-Nd(1)-O(1)  | 82.4(2)    |
| O(15)-Nd(3)-O(13) | 145.4(2)   | O(9)-Nd(1)-O(2)  | 78.6(2)    |
| O(15)-Nd(3)-O(5)  | 133.33(18) | O(7)-Nd(1)-O(6)  | 88.7(2)    |
| O(15)-Nd(3)-O(4)  | 80.2(2)    | O(7)-Nd(1)-O(8)  | 72.4(2)    |
| O(5)-Nd(3)-O(4)   | 129.8(2)   | O(7)-Nd(1)-O(9)  | 141.1(2)   |
| O(16)-Nd(3)-O(3)  | 104.22(19) | O(7)-Nd(1)-O(1)  | 76.5(2)    |
| O(16)-Nd(3)-O(13) | 141.58(19) | O(7)-Nd(1)-O(2)  | 139.6(2)   |
| O(16)-Nd(3)-O(15) | 72.70(19)  | O(2)-Nd(1)-O(1)  | 128.6(2)   |
| O(16)-Nd(3)-O(5)  | 75.27(19)  |                  |            |

**Table S2.** The important bond lengths and angles for cluster **2**.

|                     |            |                   |            |
|---------------------|------------|-------------------|------------|
| <b>Bond lengths</b> |            |                   |            |
| Sm(2)-O(6)          | 2.415(4)   | Sm(1)-O(1)        | 2.467(5)   |
| Sm(2)-O(14)         | 2.330(4)   | Sm(1)-O(11)       | 2.341(4)   |
| Sm(2)-O(13)         | 2.351(4)   | Sm(1)-O(15)       | 2.400(4)   |
| Sm(2)-O(2)          | 2.378(4)   | Sm(1)-N(1)        | 2.562(5)   |
| Sm(2)-O(3)          | 2.412(4)   | Sm(3)-O(9)        | 2.330(5)   |
| Sm(2)-O(5)          | 2.385(4)   | Sm(3)-O(3)        | 2.391(4)   |
| Sm(2)-N(6)          | 2.583(5)   | Sm(3)-O(5)        | 2.413(4)   |
| Sm(2)-N(3)          | 2.615(5)   | Sm(3)-O(4)        | 2.491(5)   |
| Sm(1)-O(12)         | 2.367(5)   | Sm(3)-O(10)       | 2.375(4)   |
| Sm(1)-O(6)          | 2.389(4)   | Sm(3)-O(8)        | 2.385(4)   |
| Sm(1)-O(16)         | 2.341(5)   | Sm(3)-O(7)        | 2.341(4)   |
| Sm(1)-O(2)          | 2.403(4)   | Sm(3)-N(4)        | 2.569(6)   |
| <b>Bond angles</b>  |            |                   |            |
| O(14)-Sm(2)-O(6)    | 83.04(15)  | O(11)-Sm(1)-O(12) | 70.69(15)  |
| O(14)-Sm(2)-O(13)   | 73.04(14)  | O(11)-Sm(1)-O(6)  | 102.32(15) |
| O(14)-Sm(2)-O(2)    | 108.04(14) | O(11)-Sm(1)-O(2)  | 75.93(14)  |
| O(14)-Sm(2)-O(3)    | 83.41(15)  | O(11)-Sm(1)-O(1)  | 86.21(18)  |
| O(14)-Sm(2)-O(5)    | 152.84(15) | O(11)-Sm(1)-O(15) | 142.64(15) |
| O(13)-Sm(2)-O(6)    | 87.20(15)  | O(15)-Sm(1)-O(2)  | 74.16(14)  |
| O(13)-Sm(2)-O(2)    | 154.87(15) | O(15)-Sm(1)-O(1)  | 93.39(19)  |
| O(13)-Sm(2)-O(3)    | 82.19(15)  | O(9)-Sm(3)-O(3)   | 84.24(16)  |

|                   |            |                  |            |
|-------------------|------------|------------------|------------|
| O(13)-Sm(2)-O(5)  | 102.94(14) | O(9)-Sm(3)-O(5)  | 134.66(15) |
| O(2)-Sm(2)-O(6)   | 68.33(14)  | O(9)-Sm(3)-O(4)  | 85.00(17)  |
| O(2)-Sm(2)-O(3)   | 122.92(14) | O(9)-Sm(3)-O(10) | 70.94(16)  |
| O(2)-Sm(2)-O(5)   | 87.03(13)  | O(9)-Sm(3)-O(8)  | 143.59(16) |
| O(3)-Sm(2)-O(6)   | 164.76(14) | O(9)-Sm(3)-O(7)  | 74.69(16)  |
| O(5)-Sm(2)-O(6)   | 123.97(14) | O(3)-Sm(3)-O(5)  | 69.31(14)  |
| O(5)-Sm(2)-O(3)   | 69.44(14)  | O(3)-Sm(3)-O(4)  | 165.53(16) |
| O(12)-Sm(1)-O(6)  | 87.19(15)  | O(5)-Sm(3)-O(4)  | 125.10(15) |
| O(12)-Sm(1)-O(2)  | 132.87(14) | O(10)-Sm(3)-O(3) | 104.31(15) |
| O(12)-Sm(1)-O(1)  | 84.54(19)  | O(10)-Sm(3)-O(5) | 80.53(15)  |
| O(12)-Sm(1)-O(15) | 146.53(15) | O(10)-Sm(3)-O(4) | 81.17(16)  |
| O(6)-Sm(1)-O(2)   | 68.36(14)  | O(10)-Sm(3)-O(8) | 145.38(16) |
| O(6)-Sm(1)-O(1)   | 165.45(17) | O(8)-Sm(3)-O(3)  | 86.40(15)  |
| O(6)-Sm(1)-O(15)  | 86.93(16)  | O(8)-Sm(3)-O(5)  | 72.59(15)  |
| O(16)-Sm(1)-O(12) | 76.34(16)  | O(8)-Sm(3)-O(4)  | 96.63(16)  |
| O(16)-Sm(1)-O(6)  | 88.40(16)  | O(7)-Sm(3)-O(3)  | 89.47(16)  |
| O(16)-Sm(1)-O(2)  | 138.51(15) | O(7)-Sm(3)-O(5)  | 137.93(15) |
| O(16)-Sm(1)-O(1)  | 78.03(18)  | O(7)-Sm(3)-O(4)  | 78.36(17)  |
| O(16)-Sm(1)-O(11) | 144.58(16) | O(7)-Sm(3)-O(10) | 141.17(16) |
| O(16)-Sm(1)-O(15) | 70.59(16)  | O(7)-Sm(3)-O(8)  | 70.10(16)  |
| O(2)-Sm(1)-O(1)   | 125.68(17) |                  |            |

**Table S3.** The important bond lengths and angles for cluster **3**.

|                     |          |                   |          |
|---------------------|----------|-------------------|----------|
| <b>Bond lengths</b> |          |                   |          |
| Gd(2)-O(11)         | 2.310(7) | Gd(3)-O(5)        | 2.391(6) |
| Gd(2)-O(12)         | 2.308(6) | Gd(3)-O(14)       | 2.316(7) |
| Gd(2)-O(3)          | 2.418(6) | Gd(3)-O(4)        | 2.464(7) |
| Gd(2)-O(5)          | 2.377(6) | Gd(3)-N(4)        | 2.545(8) |
| Gd(2)-O(2)          | 2.369(7) | Gd(1)-O(8)        | 2.339(7) |
| Gd(2)-N(6)          | 2.602(9) | Gd(1)-O(10)       | 2.355(7) |
| Gd(2)-O(6)          | 2.393(6) | Gd(1)-O(2)        | 2.397(7) |
| Gd(2)-N(3)          | 2.597(8) | Gd(1)-O(7)        | 2.336(7) |
| Gd(3)-O(16)         | 2.347(7) | Gd(1)-O(9)        | 2.304(8) |
| Gd(3)-O(13)         | 2.383(7) | Gd(1)-N(1)        | 2.541(9) |
| Gd(3)-O(3)          | 2.339(6) | Gd(1)-O(1)        | 2.453(8) |
| Gd(3)-O(15)         | 2.321(7) | Gd(1)-O(6)        | 2.360(7) |
| <b>Bond angles</b>  |          |                   |          |
| O(11)-Gd(2)-O(3)    | 85.4(2)  | O(5)-Gd(3)-O(4)   | 126.4(2) |
| O(11)-Gd(2)-O(5)    | 103.7(2) | O(14)-Gd(3)-O(16) | 142.9(3) |
| O(11)-Gd(2)-O(2)    | 151.2(2) | O(14)-Gd(3)-O(13) | 71.2(2)  |
| O(11)-Gd(2)-O(6)    | 83.7(2)  | O(14)-Gd(3)-O(3)  | 90.5(2)  |
| O(12)-Gd(2)-O(11)   | 73.8(2)  | O(14)-Gd(3)-O(15) | 74.2(3)  |
| O(12)-Gd(2)-O(3)    | 81.8(2)  | O(14)-Gd(3)-O(5)  | 138.8(2) |
| O(12)-Gd(2)-O(5)    | 149.8(2) | O(14)-Gd(3)-O(4)  | 78.9(2)  |

|                   |          |                  |          |
|-------------------|----------|------------------|----------|
| O(12)-Gd(2)-O(2)  | 108.3(2) | O(8)-Gd(1)-O(10) | 142.9(2) |
| O(12)-Gd(2)-O(6)  | 85.6(2)  | O(8)-Gd(1)-O(2)  | 75.1(2)  |
| O(5)-Gd(2)-O(3)   | 68.1(2)  | O(8)-Gd(1)-O(1)  | 94.6(3)  |
| O(5)-Gd(2)-O(6)   | 124.4(2) | O(8)-Gd(1)-O(6)  | 86.1(2)  |
| O(2)-Gd(2)-O(3)   | 123.4(2) | O(10)-Gd(1)-O(2) | 75.1(2)  |
| O(2)-Gd(2)-O(5)   | 88.3(2)  | O(10)-Gd(1)-O(1) | 86.0(3)  |
| O(2)-Gd(2)-O(6)   | 68.2(2)  | O(10)-Gd(1)-O(6) | 102.7(3) |
| O(6)-Gd(2)-O(3)   | 165.2(2) | O(2)-Gd(1)-O(1)  | 127.0(3) |
| O(16)-Gd(3)-O(13) | 143.3(2) | O(7)-Gd(1)-O(8)  | 71.0(3)  |
| O(16)-Gd(3)-O(5)  | 77.6(2)  | O(7)-Gd(1)-O(10) | 143.5(2) |
| O(16)-Gd(3)-O(4)  | 82.1(3)  | O(7)-Gd(1)-O(2)  | 140.6(2) |
| O(13)-Gd(3)-O(5)  | 73.3(2)  | O(7)-Gd(1)-O(1)  | 76.0(3)  |
| O(13)-Gd(3)-O(4)  | 97.7(2)  | O(7)-Gd(1)-O(6)  | 89.7(3)  |
| O(3)-Gd(3)-O(16)  | 100.1(2) | O(9)-Gd(1)-O(8)  | 145.5(2) |
| O(3)-Gd(3)-O(13)  | 89.9(2)  | O(9)-Gd(1)-O(10) | 71.5(2)  |
| O(3)-Gd(3)-O(5)   | 69.1(2)  | O(9)-Gd(1)-O(2)  | 132.0(2) |
| O(3)-Gd(3)-O(4)   | 164.1(2) | O(9)-Gd(1)-O(7)  | 75.3(3)  |
| O(15)-Gd(3)-O(16) | 71.7(2)  | O(9)-Gd(1)-O(1)  | 84.0(3)  |
| O(15)-Gd(3)-O(13) | 144.8(2) | O(9)-Gd(1)-O(6)  | 86.6(2)  |
| O(15)-Gd(3)-O(3)  | 84.0(2)  | O(6)-Gd(1)-O(2)  | 68.2(2)  |
| O(15)-Gd(3)-O(5)  | 134.5(2) | O(6)-Gd(1)-O(1)  | 164.5(3) |
| O(15)-Gd(3)-O(4)  | 81.8(3)  |                  |          |

**Table S4.** The important bond lengths and angles for cluster 4.

|                     |            |                  |            |
|---------------------|------------|------------------|------------|
| <b>Bond lengths</b> |            |                  |            |
| Tb(2)-O(10)         | 2.267(5)   | Tb(3)-O(8)       | 2.378(5)   |
| Tb(2)-O(9)          | 2.319(4)   | Tb(3)-O(5)       | 2.377(5)   |
| Tb(2)-O(3)          | 2.391(5)   | Tb(3)-N(4)       | 2.502(6)   |
| Tb(2)-O(2)          | 2.334(5)   | Tb(3)-O(7)       | 2.312(5)   |
| Tb(2)-O(6)          | 2.391(5)   | Tb(1)-O(11)      | 2.341(5)   |
| Tb(2)-O(5)          | 2.338(4)   | Tb(1)-O(12)      | 2.305(5)   |
| Tb(2)-N(3)          | 2.550(6)   | Tb(1)-O(13)      | 2.356(5)   |
| Tb(2)-N(6)          | 2.570(6)   | Tb(1)-O(2)       | 2.387(5)   |
| Tb(3)-O(16)         | 2.342(5)   | Tb(1)-O(6)       | 2.362(5)   |
| Tb(3)-O(3)          | 2.341(5)   | Tb(1)-O(14)      | 2.305(5)   |
| Tb(3)-O(4)          | 2.435(5)   | Tb(1)-O(1)       | 2.462(6)   |
| Tb(3)-O(15)         | 2.326(5)   | Tb(1)-N(1)       | 2.529(7)   |
| <b>Bond angles</b>  |            |                  |            |
| O(10)-Tb(2)-O(9)    | 74.47(16)  | O(5)-Tb(3)-O(8)  | 73.51(17)  |
| O(10)-Tb(2)-O(3)    | 82.56(18)  | O(7)-Tb(3)-O(16) | 75.59(18)  |
| O(10)-Tb(2)-O(2)    | 152.01(19) | O(7)-Tb(3)-O(3)  | 87.33(18)  |
| O(10)-Tb(2)-O(6)    | 83.04(18)  | O(7)-Tb(3)-O(4)  | 78.8(2)    |
| O(10)-Tb(2)-O(5)    | 106.84(16) | O(7)-Tb(3)-O(15) | 145.06(18) |
| O(9)-Tb(2)-O(3)     | 86.10(18)  | O(7)-Tb(3)-O(8)  | 72.16(19)  |

|                   |            |                   |            |
|-------------------|------------|-------------------|------------|
| O(9)-Tb(2)-O(2)   | 103.41(17) | O(7)-Tb(3)-O(5)   | 138.65(18) |
| O(9)-Tb(2)-O(6)   | 82.41(18)  | O(11)-Tb(1)-O(13) | 144.00(19) |
| O(9)-Tb(2)-O(5)   | 153.69(18) | O(11)-Tb(1)-O(2)  | 73.38(18)  |
| O(2)-Tb(2)-O(3)   | 125.39(17) | O(11)-Tb(1)-O(6)  | 86.57(17)  |
| O(2)-Tb(2)-O(6)   | 69.11(17)  | O(11)-Tb(1)-O(1)  | 96.68(18)  |
| O(2)-Tb(2)-O(5)   | 87.41(16)  | O(12)-Tb(1)-O(11) | 70.86(19)  |
| O(6)-Tb(2)-O(3)   | 163.55(16) | O(12)-Tb(1)-O(13) | 141.86(19) |
| O(5)-Tb(2)-O(3)   | 68.33(16)  | O(12)-Tb(1)-O(2)  | 139.08(18) |
| O(5)-Tb(2)-O(6)   | 123.88(16) | O(12)-Tb(1)-O(6)  | 89.78(18)  |
| O(16)-Tb(3)-O(4)  | 81.1(2)    | O(12)-Tb(1)-O(14) | 74.18(19)  |
| O(16)-Tb(3)-O(8)  | 147.44(18) | O(12)-Tb(1)-O(1)  | 76.4(2)    |
| O(16)-Tb(3)-O(5)  | 132.72(17) | O(13)-Tb(1)-O(2)  | 78.61(17)  |
| O(3)-Tb(3)-O(16)  | 87.04(18)  | O(13)-Tb(1)-O(6)  | 103.98(17) |
| O(3)-Tb(3)-O(4)   | 163.6(2)   | O(13)-Tb(1)-O(1)  | 82.68(19)  |
| O(3)-Tb(3)-O(8)   | 87.09(17)  | O(2)-Tb(1)-O(1)   | 127.43(18) |
| O(3)-Tb(3)-O(5)   | 68.53(16)  | O(6)-Tb(1)-O(2)   | 68.72(16)  |
| O(15)-Tb(3)-O(16) | 71.44(17)  | O(6)-Tb(1)-O(1)   | 163.79(19) |
| O(15)-Tb(3)-O(3)  | 102.02(18) | O(14)-Tb(1)-O(11) | 143.98(19) |
| O(15)-Tb(3)-O(4)  | 85.0(2)    | O(14)-Tb(1)-O(13) | 71.92(19)  |
| O(15)-Tb(3)-O(8)  | 141.03(18) | O(14)-Tb(1)-O(2)  | 133.96(18) |
| O(15)-Tb(3)-O(5)  | 74.92(17)  | O(14)-Tb(1)-O(6)  | 84.87(18)  |
| O(8)-Tb(3)-O(4)   | 96.8(2)    | O(14)-Tb(1)-O(1)  | 83.2(2)    |
| O(5)-Tb(3)-O(4)   | 127.83(19) |                   |            |

**Table S5.** The important bond lengths and angles for cluster **5**.

|                     |            |                   |            |
|---------------------|------------|-------------------|------------|
| <b>Bond lengths</b> |            |                   |            |
| Dy(2)-O(5)          | 2.331(5)   | Dy(3)-O(12)       | 2.350(5)   |
| Dy(2)-O(2)          | 2.319(5)   | Dy(3)-O(11)       | 2.300(5)   |
| Dy(2)-O(3)          | 2.385(5)   | Dy(3)-O(4)        | 2.418(6)   |
| Dy(2)-O(6)          | 2.383(5)   | Dy(3)-N(4)        | 2.483(7)   |
| Dy(2)-O(9)          | 2.298(5)   | Dy(1)-O(2)        | 2.372(5)   |
| Dy(2)-O(10)         | 2.261(5)   | Dy(1)-O(6)        | 2.340(5)   |
| Dy(2)-N(3)          | 2.538(6)   | Dy(1)-O(8)        | 2.319(5)   |
| Dy(2)-N(6)          | 2.544(7)   | Dy(1)-O(7)        | 2.287(6)   |
| Dy(3)-O(5)          | 2.347(5)   | Dy(1)-O(13)       | 2.333(5)   |
| Dy(3)-O(3)          | 2.318(5)   | Dy(1)-O(14)       | 2.287(6)   |
| Dy(3)-O(16)         | 2.308(5)   | Dy(1)-O(1)        | 2.455(6)   |
| Dy(3)-O(15)         | 2.316(5)   | Dy(1)-N(1)        | 2.510(7)   |
| <b>Bond angles</b>  |            |                   |            |
| O(5)-Dy(2)-O(3)     | 67.59(17)  | O(12)-Dy(3)-O(4)  | 95.3(2)    |
| O(5)-Dy(2)-O(6)     | 124.50(17) | O(11)-Dy(3)-O(5)  | 139.23(19) |
| O(2)-Dy(2)-O(5)     | 88.11(17)  | O(11)-Dy(3)-O(3)  | 87.69(19)  |
| O(2)-Dy(2)-O(3)     | 125.77(18) | O(11)-Dy(3)-O(16) | 144.04(19) |
| O(2)-Dy(2)-O(6)     | 68.89(17)  | O(11)-Dy(3)-O(15) | 74.65(19)  |

|                   |            |                   |            |
|-------------------|------------|-------------------|------------|
| O(6)-Dy(2)-O(3)   | 163.47(17) | O(11)-Dy(3)-O(12) | 72.1(2)    |
| O(9)-Dy(2)-O(5)   | 153.35(18) | O(11)-Dy(3)-O(4)  | 77.0(2)    |
| O(9)-Dy(2)-O(2)   | 102.71(18) | O(2)-Dy(1)-O(1)   | 127.82(19) |
| O(9)-Dy(2)-O(3)   | 86.59(18)  | O(6)-Dy(1)-O(2)   | 68.72(17)  |
| O(9)-Dy(2)-O(6)   | 82.13(18)  | O(6)-Dy(1)-O(1)   | 163.4(2)   |
| O(10)-Dy(2)-O(5)  | 106.58(17) | O(8)-Dy(1)-O(2)   | 73.61(19)  |
| O(10)-Dy(2)-O(2)  | 152.13(19) | O(8)-Dy(1)-O(6)   | 86.89(18)  |
| O(10)-Dy(2)-O(3)  | 82.06(18)  | O(8)-Dy(1)-O(13)  | 144.1(2)   |
| O(10)-Dy(2)-O(6)  | 83.33(18)  | O(8)-Dy(1)-O(1)   | 96.37(19)  |
| O(10)-Dy(2)-O(9)  | 74.76(18)  | O(7)-Dy(1)-O(2)   | 139.21(18) |
| O(5)-Dy(3)-O(12)  | 74.28(18)  | O(7)-Dy(1)-O(6)   | 89.93(19)  |
| O(5)-Dy(3)-O(4)   | 128.8(2)   | O(7)-Dy(1)-O(8)   | 70.8(2)    |
| O(3)-Dy(3)-O(5)   | 68.45(17)  | O(7)-Dy(1)-O(13)  | 141.9(2)   |
| O(3)-Dy(3)-O(12)  | 87.64(19)  | O(7)-Dy(1)-O(1)   | 75.9(2)    |
| O(3)-Dy(3)-O(4)   | 162.6(2)   | O(13)-Dy(1)-O(2)  | 78.46(18)  |
| O(16)-Dy(3)-O(5)  | 75.40(17)  | O(13)-Dy(1)-O(6)  | 103.68(18) |
| O(16)-Dy(3)-O(3)  | 102.23(19) | O(13)-Dy(1)-O(1)  | 83.18(19)  |
| O(16)-Dy(3)-O(15) | 71.58(18)  | O(14)-Dy(1)-O(2)  | 133.65(19) |
| O(16)-Dy(3)-O(12) | 141.81(18) | O(14)-Dy(1)-O(6)  | 84.30(19)  |
| O(16)-Dy(3)-O(4)  | 86.0(2)    | O(14)-Dy(1)-O(8)  | 143.8(2)   |
| O(15)-Dy(3)-O(5)  | 132.90(18) | O(14)-Dy(1)-O(7)  | 74.1(2)    |
| O(15)-Dy(3)-O(3)  | 86.74(19)  | O(14)-Dy(1)-O(13) | 72.1(2)    |
| O(15)-Dy(3)-O(12) | 146.45(19) | O(14)-Dy(1)-O(1)  | 83.5(2)    |
| O(15)-Dy(3)-O(4)  | 81.4(2)    |                   |            |

**Table S6.** The important bond lengths and angles for cluster **6**.

|                     |            |                 |            |
|---------------------|------------|-----------------|------------|
| <b>Bond lengths</b> |            |                 |            |
| Ho(2)-O(2)          | 2.272(4)   | Ho(1)-O(9)      | 2.265(4)   |
| Ho(2)-O(5)          | 2.279(4)   | Ho(1)-O(8)      | 2.251(5)   |
| Ho(2)-O(13)         | 2.252(4)   | Ho(1)-N(1)      | 2.456(5)   |
| Ho(2)-O(3)          | 2.358(4)   | Ho(1)-O(6)      | 2.303(4)   |
| Ho(2)-O(14)         | 2.258(4)   | Ho(3)-O(5)      | 2.328(4)   |
| Ho(2)-N(3)          | 2.523(5)   | Ho(3)-O(4)      | 2.402(5)   |
| Ho(2)-N(6)          | 2.494(5)   | Ho(3)-O(15)     | 2.283(4)   |
| Ho(2)-O(6)          | 2.346(4)   | Ho(3)-O(3)      | 2.297(4)   |
| Ho(1)-O(2)          | 2.316(4)   | Ho(3)-O(12)     | 2.252(5)   |
| Ho(1)-O(10)         | 2.271(4)   | Ho(3)-O(11)     | 2.282(4)   |
| Ho(1)-O(7)          | 2.313(4)   | Ho(3)-O(16)     | 2.260(4)   |
| Ho(1)-O(1)          | 2.376(5)   | Ho(3)-N(4)      | 2.479(6)   |
| <b>Bond angles</b>  |            |                 |            |
| O(2)-Ho(2)-O(5)     | 88.12(14)  | O(8)-Ho(1)-O(7) | 72.41(16)  |
| O(2)-Ho(2)-O(3)     | 125.72(15) | O(8)-Ho(1)-O(1) | 76.40(18)  |
| O(2)-Ho(2)-O(6)     | 67.99(14)  | O(8)-Ho(1)-O(9) | 143.92(16) |
| O(5)-Ho(2)-O(3)     | 68.75(14)  | O(8)-Ho(1)-O(6) | 86.83(16)  |

|                   |            |                   |            |
|-------------------|------------|-------------------|------------|
| O(5)-Ho(2)-O(6)   | 127.48(15) | O(6)-Ho(1)-O(2)   | 68.00(15)  |
| O(13)-Ho(2)-O(2)  | 107.24(14) | O(6)-Ho(1)-O(7)   | 86.49(15)  |
| O(13)-Ho(2)-O(5)  | 152.86(15) | O(6)-Ho(1)-O(1)   | 161.47(17) |
| O(13)-Ho(2)-O(3)  | 84.17(15)  | O(5)-Ho(3)-O(4)   | 128.70(16) |
| O(13)-Ho(2)-O(14) | 75.86(15)  | O(15)-Ho(3)-O(5)  | 73.48(15)  |
| O(13)-Ho(2)-O(6)  | 79.54(15)  | O(15)-Ho(3)-O(4)  | 96.39(16)  |
| O(14)-Ho(2)-O(2)  | 153.34(16) | O(15)-Ho(3)-O(3)  | 87.69(15)  |
| O(14)-Ho(2)-O(5)  | 100.53(15) | O(3)-Ho(3)-O(5)   | 68.96(14)  |
| O(14)-Ho(2)-O(3)  | 80.73(15)  | O(3)-Ho(3)-O(4)   | 162.31(17) |
| O(14)-Ho(2)-O(6)  | 87.11(15)  | O(12)-Ho(3)-O(5)  | 133.36(15) |
| O(6)-Ho(2)-O(3)   | 161.65(14) | O(12)-Ho(3)-O(4)  | 83.35(17)  |
| O(2)-Ho(1)-O(1)   | 130.34(16) | O(12)-Ho(3)-O(15) | 143.93(16) |
| O(10)-Ho(1)-O(2)  | 133.28(15) | O(12)-Ho(3)-O(3)  | 83.28(16)  |
| O(10)-Ho(1)-O(7)  | 145.18(16) | O(12)-Ho(3)-O(11) | 72.92(16)  |
| O(10)-Ho(1)-O(1)  | 80.22(18)  | O(12)-Ho(3)-O(16) | 72.58(16)  |
| O(10)-Ho(1)-O(6)  | 87.47(16)  | O(11)-Ho(3)-O(5)  | 78.31(16)  |
| O(7)-Ho(1)-O(2)   | 74.80(15)  | O(11)-Ho(3)-O(4)  | 82.95(16)  |
| O(7)-Ho(1)-O(1)   | 95.71(18)  | O(11)-Ho(3)-O(15) | 143.04(16) |
| O(9)-Ho(1)-O(2)   | 75.04(15)  | O(11)-Ho(3)-O(3)  | 104.05(15) |
| O(9)-Ho(1)-O(10)  | 73.05(15)  | O(16)-Ho(3)-O(5)  | 139.65(16) |
| O(9)-Ho(1)-O(7)   | 141.56(16) | O(16)-Ho(3)-O(4)  | 76.20(18)  |
| O(9)-Ho(1)-O(1)   | 86.09(17)  | O(16)-Ho(3)-O(15) | 72.38(16)  |
| O(9)-Ho(1)-O(6)   | 103.60(15) | O(16)-Ho(3)-O(3)  | 88.77(16)  |
| O(8)-Ho(1)-O(2)   | 139.52(16) | O(16)-Ho(3)-O(11) | 141.31(17) |
| O(8)-Ho(1)-O(10)  | 73.04(16)  |                   |            |

**Table S7.** The important bond lengths and angles for cluster 7.

|                     |           |                  |            |
|---------------------|-----------|------------------|------------|
| <b>Bond lengths</b> |           |                  |            |
| Er(2)-O(3)          | 2.384(5)  | Er(1)-O(7)       | 2.272(5)   |
| Er(2)-O(11)         | 2.280(5)  | Er(1)-O(10)      | 2.291(5)   |
| Er(2)-O(12)         | 2.289(5)  | Er(1)-N(1)       | 2.475(6)   |
| Er(2)-O(2)          | 2.302(5)  | Er(1)-O(1)       | 2.388(5)   |
| Er(2)-O(6)          | 2.368(5)  | Er(3)-O(3)       | 2.322(5)   |
| Er(2)-O(5)          | 2.303(5)  | Er(3)-O(14)      | 2.276(5)   |
| Er(2)-N(6)          | 2.516(6)  | Er(3)-O(13)      | 2.317(5)   |
| Er(2)-N(3)          | 2.538(6)  | Er(3)-O(4)       | 2.418(5)   |
| Er(1)-O(9)          | 2.301(5)  | Er(3)-O(15)      | 2.319(5)   |
| Er(1)-O(8)          | 2.344(5)  | Er(3)-O(16)      | 2.285(5)   |
| Er(1)-O(2)          | 2.337(5)  | Er(3)-N(4)       | 2.503(7)   |
| Er(1)-O(6)          | 2.316(5)  | Er(3)-O(5)       | 2.345(5)   |
| <b>Bond angles</b>  |           |                  |            |
| O(11)-Er(2)-O(3)    | 84.37(17) | O(7)-Er(1)-O(10) | 143.54(19) |
| O(11)-Er(2)-O(12)   | 75.24(17) | O(7)-Er(1)-O(1)  | 76.4(2)    |

|                  |            |                   |            |
|------------------|------------|-------------------|------------|
| O(11)-Er(2)-O(2) | 107.96(16) | O(10)-Er(1)-O(9)  | 72.35(18)  |
| O(11)-Er(2)-O(6) | 79.61(17)  | O(10)-Er(1)-O(8)  | 142.51(17) |
| O(11)-Er(2)-O(5) | 153.29(17) | O(10)-Er(1)-O(2)  | 75.28(17)  |
| O(12)-Er(2)-O(3) | 80.74(18)  | O(10)-Er(1)-O(6)  | 103.09(18) |
| O(12)-Er(2)-O(2) | 153.91(18) | O(10)-Er(1)-O(1)  | 86.4(2)    |
| O(12)-Er(2)-O(6) | 87.73(18)  | O(3)-Er(3)-O(4)   | 162.87(19) |
| O(12)-Er(2)-O(5) | 100.22(17) | O(3)-Er(3)-O(5)   | 69.30(17)  |
| O(2)-Er(2)-O(3)  | 125.10(17) | O(14)-Er(3)-O(3)  | 83.22(19)  |
| O(2)-Er(2)-O(6)  | 67.98(16)  | O(14)-Er(3)-O(13) | 72.79(19)  |
| O(2)-Er(2)-O(5)  | 87.79(17)  | O(14)-Er(3)-O(4)  | 83.7(2)    |
| O(6)-Er(2)-O(3)  | 162.22(17) | O(14)-Er(3)-O(15) | 143.89(19) |
| O(5)-Er(2)-O(3)  | 68.93(17)  | O(14)-Er(3)-O(16) | 72.80(19)  |
| O(5)-Er(2)-O(6)  | 126.91(17) | O(14)-Er(3)-O(5)  | 133.86(18) |
| O(9)-Er(1)-O(8)  | 144.92(18) | O(13)-Er(3)-O(3)  | 103.75(18) |
| O(9)-Er(1)-O(2)  | 133.32(17) | O(13)-Er(3)-O(4)  | 82.8(2)    |
| O(9)-Er(1)-O(6)  | 87.34(19)  | O(13)-Er(3)-O(15) | 143.17(19) |
| O(9)-Er(1)-O(1)  | 81.1(2)    | O(13)-Er(3)-O(5)  | 78.55(18)  |
| O(8)-Er(1)-O(1)  | 94.9(2)    | O(15)-Er(3)-O(3)  | 88.26(18)  |
| O(2)-Er(1)-O(8)  | 75.20(17)  | O(15)-Er(3)-O(4)  | 95.82(19)  |
| O(2)-Er(1)-O(1)  | 129.34(19) | O(15)-Er(3)-O(5)  | 73.40(18)  |
| O(6)-Er(1)-O(8)  | 86.82(18)  | O(16)-Er(3)-O(3)  | 88.70(19)  |
| O(6)-Er(1)-O(2)  | 68.29(17)  | O(16)-Er(3)-O(13) | 141.54(19) |
| O(6)-Er(1)-O(1)  | 162.13(19) | O(16)-Er(3)-O(4)  | 76.8(2)    |
| O(7)-Er(1)-O(9)  | 73.36(19)  | O(16)-Er(3)-O(15) | 71.98(19)  |
| O(7)-Er(1)-O(8)  | 71.84(19)  | O(16)-Er(3)-O(5)  | 139.22(18) |
| O(7)-Er(1)-O(2)  | 139.74(19) | O(5)-Er(3)-O(4)   | 127.80(18) |
| O(7)-Er(1)-O(6)  | 87.27(19)  |                   |            |

**Table S8** The Dy<sup>III</sup> geometry analysis by SHAPE 2.0 for cluster **5**.

| Cluster <b>5</b>   | $D_{4d}$ SAPR | $D_{2d}$ TDD | $C_{2v}$ JBTPR | $C_{2v}$ BTPR | $D_{2d}$ JSD |
|--------------------|---------------|--------------|----------------|---------------|--------------|
| Dy1 <sup>III</sup> | 4.365         | 1.006        | 3.035          | 3.0163        | 3.010        |
| Dy2 <sup>III</sup> | 4.357         | 0.975        | 2.858          | 2.437         | 2.987        |
| Dy3 <sup>III</sup> | 4.128         | 0.736        | 2.875          | 2.763         | 2.857        |

**SAPR-8** = Square antiprism; **TDD-8** = Triangular dodecahedron; **JBTPR-8** = Biaugmented trigonal prism J50; **BTPR-8** = Biaugmented trigonal prism; **JSD-8** = Snub diphenoid J84



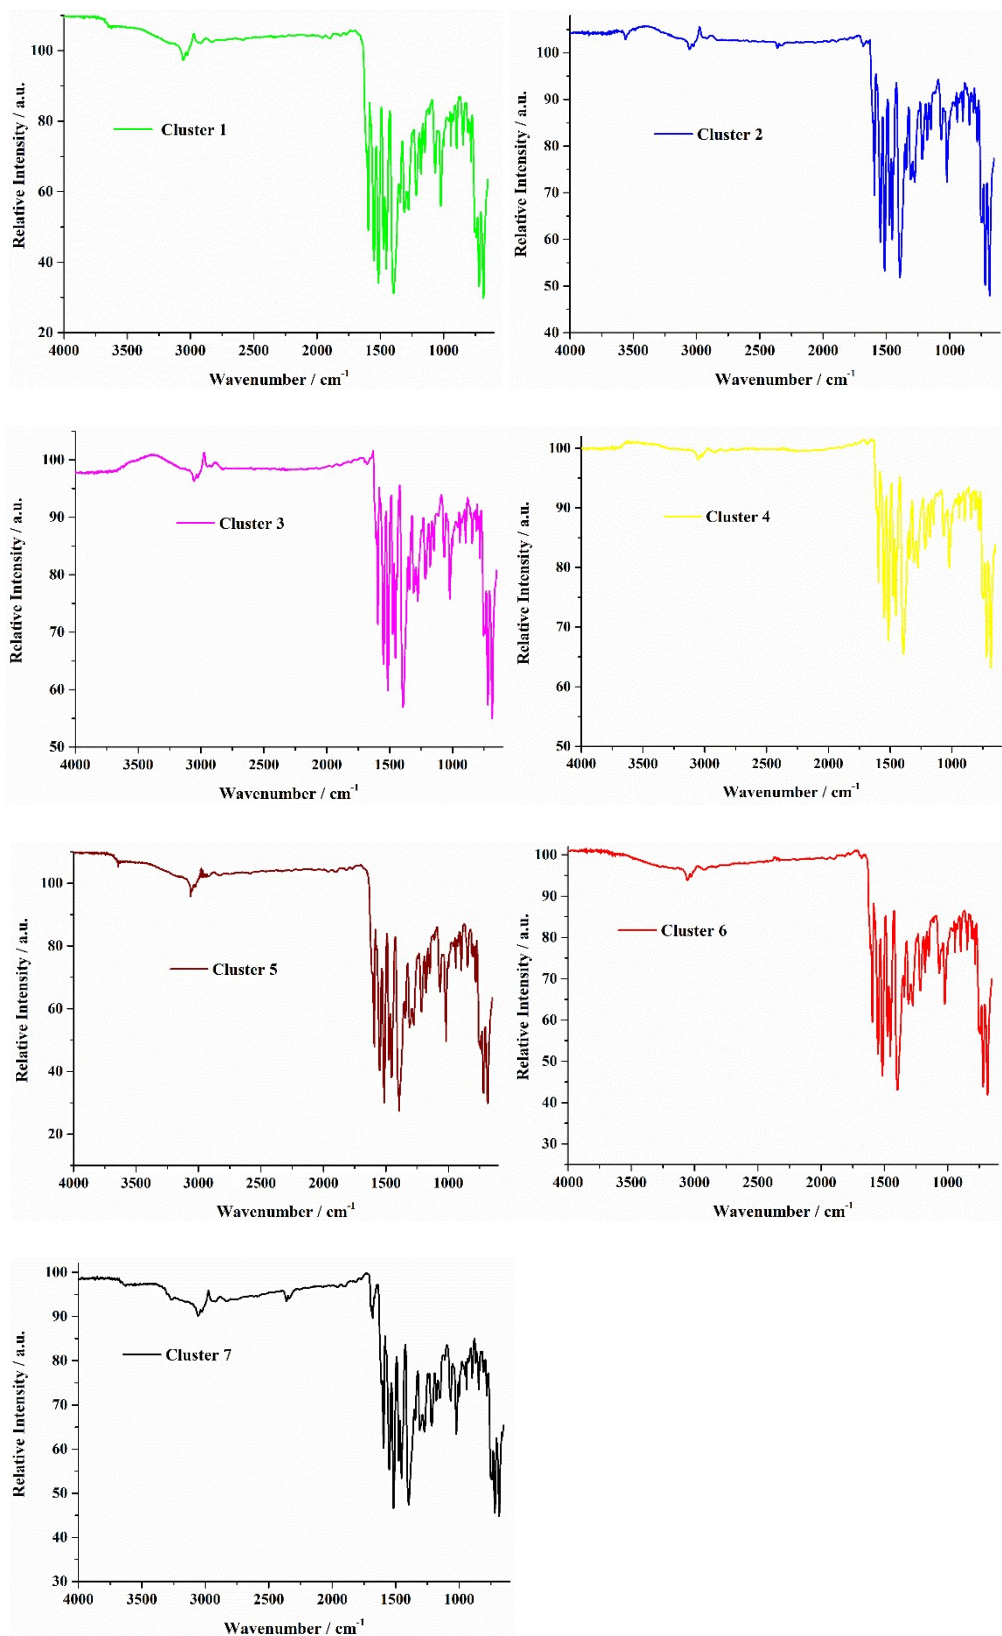

Fig. S1 The IR spectra of clusters 1-7.

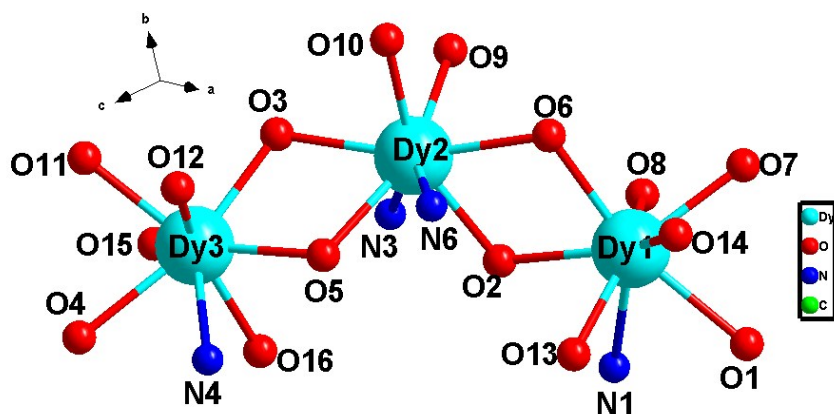

Fig. S2 The coordinate atom labels of central Dy(III) ions in cluster 5.

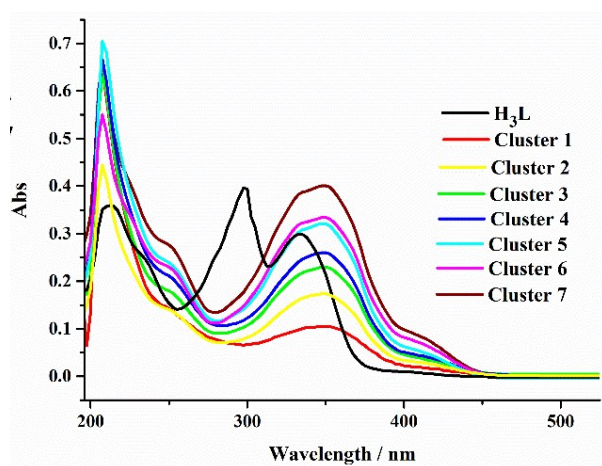

Fig. S3 The UV-vis spectra of clusters 1 -7 and H<sub>3</sub>L ligand were performed at room temperature in ethanol solution.

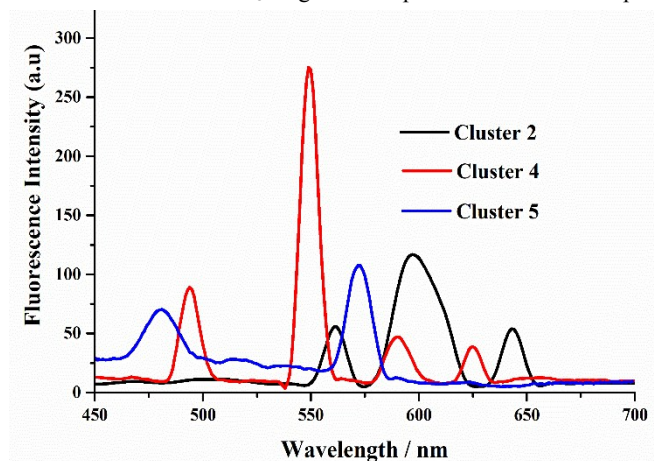

Fig. S4 The solid-state luminescence spectra of clusters 2, 4 and 5 at room temperature.

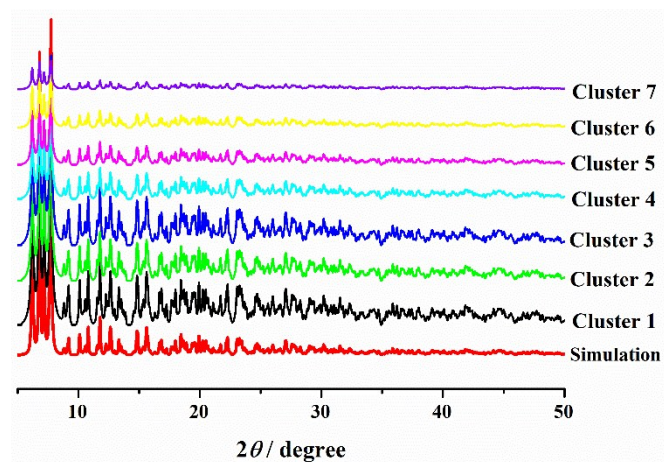

Fig. S5 PXRD patterns for clusters 1-7.

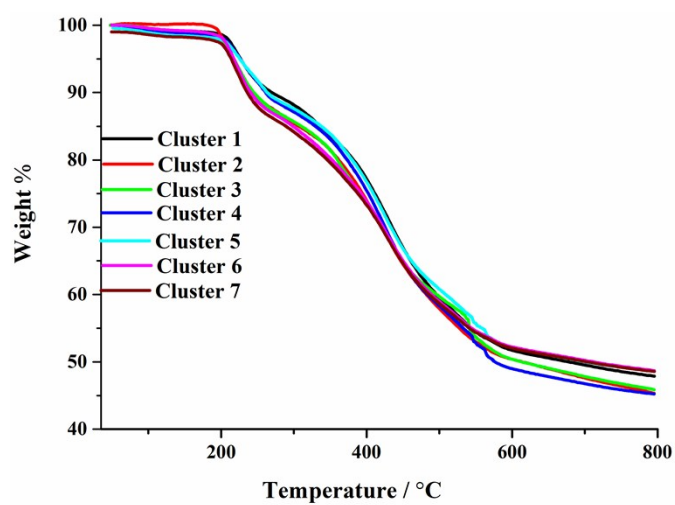

Fig. S6 The TGA curves of clusters 1-7.

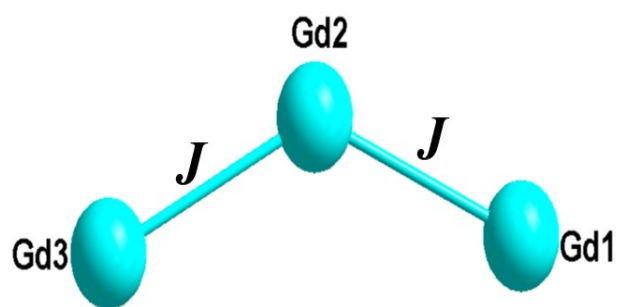

Fig. S7 The magnetic coupling model of Gd(III) ions in cluster 3.
